# Supplementary material for: Eye Contact Perception in the West and East: A Cross-Cultural Study
Source: PLoS One. 2015 Feb 25;10(2):e0118094. doi: 10.1371/journal.pone.0118094 (PMC4340785; doi:10.1371/journal.pone.0118094)
Supplement: S1 Dataset — (XLSX) [file pone.0118094.s001.xlsx]

## Sheet: gaze direction
group (1=J, 2=F)	ID	gender (1=M, 2=F)	age	AQ	SP	JPN_0	JPN_2	JPN_4	JPN_6	JPN_8	JPN_10	FIN_0	FIN_2	FIN_4	FIN_6	FIN_8	FIN_10
1	1	1	23	30	41	100	81.25	62.5	31.25	12.5	0	100	87.5	68.75	31.25	12.5	0
1	2	2	21	10	5	100	75	50	12.5	0	0	87.5	75	43.75	0	0	0
1	3	1	20	16	23	100	87.5	54.4643	31.25	31.25	0	87.5	93.75	56.25	43.75	31.25	25
1	4	2	20	28	28	87.5	87.5	43.75	31.25	6.25	0	87.5	93.75	43.75	31.25	12.5	6.25
1	5	2	23	14	9	100	68.75	60.7143	12.5	0	0	75	93.75	50	25	12.5	0
1	6	1	23	31	20	100	81.25	37.5	0	0	0	87.5	75	62.5	18.75	6.25	0
1	7	1	22	25	22	100	87.5	75	37.5	6.25	6.25	100	87.5	68.75	25	18.75	6.25
1	8	2	24	24	57	100	100	62.5	43.75	6.25	6.25	75	75	56.25	50	25	12.5
1	9	1	37	24	8	100	87.5	68.75	56.25	18.75	0	100	92.8571	81.25	54.7619	25.8929	6.25
1	10	2	22	15	38	100	75	43.75	40.1786	6.25	0	100	81.25	50	33.9286	7.14286	0
1	11	1	23	32	40	87.5	81.25	56.25	25	6.25	0	100	93.75	62.5	37.5	6.25	0
1	12	2	19	24	24	100	93.75	50	18.75	0	0	100	81.25	56.25	18.75	6.25	6.25
1	13	2	21	25	33	100	93.75	56.25	12.5	6.25	0	100	93.75	31.25	0	0	0
1	14	2	18	20	34	50	68.75	43.75	18.75	0	0	87.5	50	37.5	12.5	12.5	0
1	15	2	19	19	16	87.5	81.25	37.5	6.25	0	0	75	37.5	37.5	6.25	0	0
1	16	2	19	18	36	75	87.5	37.5	12.5	0	0	75	68.75	31.25	6.25	0	0
1	17	2	23	15	10	87.5	62.5	37.5	12.5	12.5	0	100	62.5	43.75	18.75	0	0
1	18	2	23	24	24	100	68.75	18.75	6.25	0	0	62.5	56.25	12.5	6.25	0	0
1	19	2	22	24	45	100	87.5	43.75	18.75	0	0	100	100	68.75	50	0	0
1	20	2	20	25	32	100	87.5	68.75	31.25	12.5	0	87.5	62.5	56.25	25	12.5	6.25
1	21	2	20	12	13	87.5	81.25	56.25	12.5	0	0	87.5	68.75	43.75	0	0	0
1	22	2	22	23	13	100	87.5	12.5	6.25	0	0	87.5	50	37.5	6.25	6.25	0
1	23	2	21	22	35	87.5	87.5	62.5	50	12.5	0	87.5	68.75	50	31.25	12.5	6.25
1	24	2	20	9	40	87.5	93.75	75	25	0	0	100	75	66.0714	18.75	25	0
1	25	2	20	26	26	100	56.25	25	0	0	0	75	68.75	18.75	6.25	0	0
1	26	2	25	13	12	87.5	57.1429	85.7143	18.75	6.25	6.25	75	86.6071	74.1071	13.3929	6.25	13.3929
1	27	2	19	26	43	100	75	50	31.25	18.75	0	62.5	87.5	75	25	18.75	6.25
1	28	2	20	26	31	100	62.5	37.5	6.25	12.5	0	75	62.5	31.25	6.25	0	0
1	29	2	21	23	32	87.5	81.25	50	25	0	0	100	81.25	56.25	31.25	0	0
1	30	2	24	28	29	100	81.25	68.75	18.75	0	0	75	100	62.5	56.25	25	12.5
2	1	2	22	11	17	100	93.75	75	37.5	0	0	75	68.75	50	12.5	18.75	0
2	2	1	20	10	16	100	87.5	43.75	12.5	0	0	100	75	25	6.25	0	0
2	3	2	19	5	20	100	81.25	18.75	6.25	0	0	85.7143	68.75	18.75	0	0	0
2	4	2	31	18	6	87.5	75	31.25	6.25	0	0	100	62.5	43.75	6.25	0	0
2	5	2	19	10	18	100	86.6071	50	25	0	0	100	80.3571	60.7143	21.4286	0	0
2	6	2	28	15	24	87.5	100	66.0714	33.9286	6.25	0	87.5	81.25	50	35.7143	12.5	6.25
2	7	2	28	4	14	100	87.5	31.25	6.25	0	0	100	93.75	12.5	0	0	0
2	8	2	19	18	32	100	62.5	18.75	6.25	6.25	0	87.5	75	37.5	6.25	0	0
2	9	2	26	14	17	87.5	75	18.75	0	0	0	100	60.7143	25	0	0	0
2	10	2	31	14	22	100	81.25	43.75	31.25	18.75	18.75	100	62.5	31.25	12.5	0	0
2	11	2	20	14	19	50	37.5	18.75	0	0	0	62.5	43.75	18.75	6.25	0	0
2	12	2	21	6	11	100	87.5	56.25	12.5	6.25	0	100	100	62.5	18.75	12.5	0
2	13	2	20	16	33	100	92.8571	93.75	56.25	25	12.5	87.5	93.75	75	37.5	12.5	0
2	14	2	26	6	13	100	93.75	93.75	68.75	12.5	0	100	100	75	37.5	0	0
2	15	2	19	5	11	100	75	37.5	12.5	6.25	6.25	100	68.75	50	0	0	6.25
2	16	2	19	18	17	100	87.5	50	18.75	0	7.14281	87.5	73.2143	33.0357	14.5833	0	0
2	17	2	20	24	15	100	81.25	18.75	6.25	0	0	87.5	56.25	12.5	0	0	0
2	18	2	19	15	27	87.5	50	18.75	0	0	0	25	31.25	6.25	0	0	0
2	19	2	24	23	31	87.5	75	50	12.5	6.25	6.25	87.5	75	37.5	12.5	12.5	6.25
2	20	2	20	9	33	87.5	87.5	62.5	25	12.5	6.25	87.5	75	62.5	25	12.5	6.25
2	21	1	21	13	8	100	93.75	68.75	56.25	6.25	18.75	100	93.75	50	25	6.25	0
2	22	1	34	19	3	100	75	37.5	12.5	0	0	75	68.75	25	12.5	6.25	0
2	23	2	21	10	16	100	81.25	43.75	18.75	0	0	87.5	81.25	61.6071	6.25	0	6.25
2	24	2	18	24	17	100	93.75	81.25	31.25	0	0	100	87.5	62.5	25	0	0
2	25	1	24	15	10	100	62.5	50	31.25	0	6.25	87.5	67.8571	43.75	31.25	31.25	6.25
2	26	2	24	4	15	100	100	62.5	25	6.25	0	100	81.25	75	25	12.5	0
2	27	2	20	14	16	87.5	93.75	43.75	6.25	0	6.25	87.5	68.75	31.25	0	6.25	6.25
2	28	2	21	11	7	100	100	68.75	40.1786	12.5	6.25	87.5	75	59.8214	18.75	6.25	0
2	29	1	22	9	29	62.5	81.25	37.5	0	0	7.14286	87.5	75	50	31.25	12.5	0
2	30	2	33	13	17	87.5	68.75	25	6.25	0	0	75	56.25	18.75	6.25	0	0

## Sheet: pleasantness
group (1=J, 2=F)	ID	JPN_direct	JPN_averted	FIN_direct	FIN_averted
1	1	5.25	4.75	4.5	4.875
1	2	5	3.875	6	4.625
1	3	4.375	4.5	5.25	4.875
1	4	4.25	4.375	3.625	3.85714
1	5	4	4.42857	4.375	4.375
1	6	4.375	4.5	4.5	4.625
1	7	4	3.25	4	3.25
1	8	5.375	4.875	5.25	4.875
1	9	4.875	4	4.25	3.875
1	10	3.875	4.125	2.875	3
1	11	4.75	4.375	4.375	4.5
1	12	3.75	2.5	3.875	2.75
1	13	7.33333	4.875	5.25	3.625
1	14	4.125	4	4	4.125
1	15	7.5	6.625	6.5	6.125
1	16	5.25	4.625	4.5	4.125
1	17	4.625	4	4.625	3.75
1	18	4.5	4.5	4.75	4.75
1	19	5.125	3.5	5	3.625
1	20	3.875	2.75	3.25	2.875
1	21	3.5	3.375	4.25	4.5
1	22	3.5	4	3.5	3.875
1	23	4.625	4.875	4.375	4.25
1	24	4.125	4	3.75	4.125
1	25	5.5	6	5.375	4.5
1	26	4.875	4.875	4.375	5
1	27	4	3	3.625	2.5
1	28	3.75	4.375	4.625	5
1	29	5.875	3.875	5.375	3.25
1	30	3.25	4.375	4.25	5.375
2	1	4.625	5.125	4.625	4.875
2	2	6.625	7	6.375	6.625
2	3	3.75	4.25	4	4.5
2	4	5.375	5.625	5.625	5.75
2	5	4.75	3.875	4.125	4
2	6	4.625	3.375	6.125	4.75
2	7	6	5.375	4.875	5.375
2	8	4.5	6	4.25	6.5
2	9	4.125	5	4.625	4.625
2	10	5.125	4.375	5.5	4.625
2	11	4	4.5	5.875	6
2	12	5.125	4.5	5.125	4.875
2	13	5.375	4.75	4.25	4
2	14	5.625	5.625	6.375	6
2	15	4.25	3.875	3.625	3.75
2	16	5.625	5.125	6.25	6.125
2	17	4.625	4.875	3.375	4.5
2	18	5.25	4.625	4.25	4.25
2	19	4.75	5.25	4.5	4.625
2	20	4	3.25	4.875	2.625
2	21	3.875	4.5	4.375	4.875
2	22	4.5	4.5	3.625	3.75
2	23	3	3.875	2.75	4
2	24	4.75	4.5	4.75	4.75
2	25	4.625	4.875	5.25	4.875
2	26	5.375	4	5.875	3.375
2	27	4.25	5	4.625	4.125
2	28	6.375	4.75	5.375	5.625
2	29	3.625	4.375	3.875	4.375
2	30	6.375	3.875	5	5.75

## Sheet: arousal
group (1=J, 2=F)	ID	JPN_direct	JPN_averted	FIN_direct	FIN_averted
1	1	2.875	3.5	3.75	4.125
1	2	2	2.875	1.25	2.375
1	3	5.125	5.125	4.125	4.125
1	4	5	5	5.875	5.85714
1	5	5.375	4.57143	5.375	5
1	6	5.625	5.625	5	4.875
1	7	6	5.5	5.625	5.125
1	8	6.375	3.25	6.375	4
1	9	5.125	4.375	4.625	4.5
1	10	3	2.875	2.875	3
1	11	4.375	3.5	5.25	4.625
1	12	3.625	3.5	3.25	4.25
1	13	3.75	5.5	6.5	7.5
1	14	3.14286	2.875	3.875	3.25
1	15	3.625	4	5.625	5.875
1	16	3.125	3.125	3.375	4.125
1	17	4.375	3.625	4.625	4.125
1	18	5	5	5	5
1	19	4.5	5.5	4.75	5.375
1	20	5.25	5.625	5.625	6.125
1	21	4.875	5	4.5	5
1	22	4.75	4	5.125	4.25
1	23	4.625	4.25	5	4.75
1	24	5.25	5.125	5.75	5.125
1	25	4.75	3	5.875	4.5
1	26	5.875	4.75	5.875	5
1	27	3.375	3	4.375	3.625
1	28	5.125	4	3.625	3.5
1	29	4.875	6	4.5	7
1	30	6.25	4.5	5.125	3.5
2	1	5.625	5.25	5.125	4.5
2	2	3.125	2.75	2.875	2.75
2	3	5.75	4	5.25	4.25
2	4	4	3.125	4.875	3
2	5	5.75	3.625	5.5	4.125
2	6	5.125	6.25	4.625	4.875
2	7	3.625	3.625	4	3.875
2	8	5.125	3.875	4.5	3
2	9	5.25	4.75	5.875	4.875
2	10	4.625	5.5	4.375	5.125
2	11	5.25	3.875	3.125	3.375
2	12	3.75	2.875	2.25	2.375
2	13	3.875	4.625	5.125	4.625
2	14	2.375	2.375	2.375	2.125
2	15	6.5	5.75	5.125	4.875
2	16	4.875	3.75	4.125	4.25
2	17	4.625	5.375	5.625	4.375
2	18	4.875	3.5	4.875	4
2	19	4.75	4.125	4.875	5.125
2	20	2.625	2.875	2.375	3.25
2	21	5.75	4.25	4	3.5
2	22	4.375	3.875	5.125	3.5
2	23	3.625	3.375	5.125	3.375
2	24	1.625	2	1.875	2.125
2	25	4.75	4.375	3.75	4.875
2	26	4.25	4.375	3.75	4.875
2	27	5.25	4.375	5.25	4.125
2	28	3.75	4	4.125	3.25
2	29	5	3.625	5.25	4.625
2	30	5.125	6.875	6.625	4.75

## Sheet: dominance
group (1=J, 2=F)	ID	JPN_direct	JPN_averted	FIN_direct	FIN_averted
1	1	5.25	4.75	4.5	4.875
1	2	5.75	3.875	6	4.625
1	3	5	5.125	6.125	5.75
1	4	5	4.125	5.625	5.5
1	5	6.375	5.375	5.5	5.25
1	6	5.375	5.125	5.125	4.625
1	7	6.5	4.375	5.125	5.125
1	8	5	4.625	6	5.875
1	9	6.5	4	6.5	3.5
1	10	5.875	5	5.875	5.25
1	11	6.625	5.625	6	5.125
1	12	5.25	4.75	6.625	6.375
1	13	5	2.375	7.25	4.875
1	14	5.14286	5.875	5.5	5.375
1	15	4	6	5.125	4.375
1	16	6	4.375	6.875	5.875
1	17	5.375	5.75	6.375	5.875
1	18	5.375	5.625	5.5	5.75
1	19	4.75	4.625	5.625	5.375
1	20	6.125	4.875	5.75	4.125
1	21	1.875	1.875	6.5	5.5
1	22	6	5.25	6.125	5.75
1	23	5.375	4.875	5.25	5.25
1	24	5.375	4.875	5.75	6
1	25	4	4.875	5.625	5
1	26	5.71429	4.85714	5.75	5.5
1	27	2.375	3.625	4	5
1	28	6.875	6.5	6.75	5.625
1	29	5	6.125	5.125	6.875
1	30	6.375	6.125	4.5	5.25
2	1	6.875	5.875	4.625	4.375
2	2	5.875	5.375	6.375	5.75
2	3	6.5	5.875	6.375	4.875
2	4	5.75	5.125	5.625	4.125
2	5	5.5	4.625	6.75	5
2	6	5.5	7	5.875	4.75
2	7	7.125	4.375	5.125	2.125
2	8	6.125	5.125	5	4
2	9	5.75	4	6.125	4.125
2	10	7.625	4.625	5.5	4.75
2	11	5.625	3.875	5.125	5
2	12	5.25	4.625	5.75	5.25
2	13	5.5	5.875	5.42857	5.5
2	14	5.75	5.75	4.875	3.875
2	15	6.375	6.125	4.875	5.125
2	16	5.25	4.25	4.375	4.75
2	17	5.875	4.75	5.125	3.875
2	18	5.5	4.5	5.125	5
2	19	5.25	4.625	5.625	5.625
2	20	6.25	4.25	6.125	4.125
2	21	6.75	3.125	5.625	2.875
2	22	6.125	4.75	5.375	4.5
2	23	7.125	6.125	5.625	5.125
2	24	4.75	4.5	4.75	4.75
2	25	5.75	5.5	6.75	3.75
2	26	5.5	4.25	4.25	3.625
2	27	6.125	2.875	5.875	4.625
2	28	5.5	5	5.125	4.625
2	29	6.875	5.625	5.25	4.5
2	30	5	4.375	5.375	5.375

## Sheet: warmth
group (1=J, 2=F)	ID	JPN_direct	JPN_averted	FIN_direct	FIN_averted
1	1	2.875	3.5	3.75	4.125
1	2	1.25	2.875	1.25	2.375
1	3	4.125	4.5	3.75	4.75
1	4	5	5.25	4.5	4.5
1	5	4.125	4.125	4.625	5.25
1	6	4.5	4.5	4.625	4.75
1	7	3.125	4.375	3.5	3
1	8	4.125	4.75	5.5	4.125
1	9	5.375	4	5	3.375
1	10	4	4.75	4.375	4
1	11	3.375	3.875	4.75	4.875
1	12	3.375	2.25	2.75	2.625
1	13	4.625	6.875	2.75	4.375
1	14	4.14286	3.625	4	3.875
1	15	5.625	5.5	4.875	4.75
1	16	3.375	5.75	4	4.375
1	17	4.125	4	3.125	3.75
1	18	4.375	3.875	4.5	4.375
1	19	4.875	4	4.75	3.875
1	20	2.5	2.25	3	4
1	21	4.25	4.25	5.375	5.5
1	22	4.25	3.375	3.5	4.125
1	23	4.5	4.875	4	4.375
1	24	4.375	4.375	3.875	3.875
1	25	4.5	3.625	3.75	4.375
1	26	4.28571	4.42857	4	4.125
1	27	3.125	2.625	4	3.75
1	28	5.375	3.5	6.375	3.75
1	29	5.25	4	4.5	2.625
1	30	3.625	2.75	4.875	3.375
2	1	4.875	4.75	5.75	5.75
2	2	4.75	4.625	4.25	4.125
2	3	4	4.625	4.5	5
2	4	5.125	5.625	4.875	4.5
2	5	4.71429	5.75	4.375	4.5
2	6	4.25	3.25	5.75	5.625
2	7	5.625	6.5	4.375	6.75
2	8	4.125	5.75	6.25	5.75
2	9	5.5	5.25	3.75	5.25
2	10	3.5	5	5.5	4.625
2	11	3.875	4	4.75	5
2	12	3.5	4	4.125	4.25
2	13	5.875	4.625	5.5	3.75
2	14	4	3.25	4.25	4
2	15	4.25	4	3.75	4
2	16	5.375	4.375	5.5	5.125
2	17	3.875	5.25	5	5.625
2	18	4.25	4.625	4.5	4
2	19	5.25	6	4.5	5
2	20	4	3.75	4.5	4.375
2	21	2.875	4.375	5.125	4.5
2	22	5	4.875	3.875	4.125
2	23	3.125	3.5	3.75	3.875
2	24	1.625	2	1.875	2.125
2	25	4.25	3.75	4.625	4
2	26	5.5	5.125	5	4.875
2	27	5.25	4.5	4.5	3.125
2	28	5.75	4.75	6.25	5.375
2	29	4.5	5.125	4.625	4.375
2	30	5.125	5.5	5.25	5.125

## Sheet: emotion
group (1=J, 2=F)	JPN_AN	JPN_DI	JPN_FE	JPN_NE	JPN_HA	JPN_SA	JPN_SU	FIN_AN	FIN_DI	FIN_FE	FIN_NE	FIN_HA	FIN_SA	FIN_SU
1	4	4.625	3	6.375	4.25	3.75	2.375	4.875	5.125	3.75	4.875	3.25	4	3.375
1	3	4.125	1.5	5.125	1	2.5	2	3.75	3.25	1.875	4.75	1.875	1.5	1.875
1	3.625	3.875	2.375	5.125	4.375	2.375	3.25	4.25	4	3.125	5	4.625	3.875	2
1	4.375	5.5	3.75	6.125	3.75	5.375	1.875	6	5.875	5.75	5.375	2.5	6.375	4.5
1	4.375	4.5	1.375	6.625	3.625	2.25	1.875	4.5	4.625	1	6.625	3.125	2	1.625
1	4.625	3.75	2.625	4.25	3.25	3	1.875	4.25	4	3.625	4.625	3.5	4	2.25
1	3.625	4.625	3.125	6.75	2.375	4.125	1.875	5.25	4.125	3.125	5.25	3.75	4.875	1.75
1	3.5	4.75	3.75	4	3.25	3.75	1.875	4.375	3.875	3.5	2.375	3.875	3.5	2.375
1	4.375	4.5	3.125	5.625	4.625	3.25	3.875	5	3.75	3	6.25	4.875	4.125	4.25
1	5.125	5	3.5	5.25	3.875	3.375	3.875	5.5	5.125	4.5	4.875	4.25	4	4.375
1	2.75	4.375	4.25	4.25	4.375	4.75	3.75	4.75	5.5	3.375	2.625	4	5.125	4.125
1	3.25	2.5	1.625	7.25	2.25	1.875	1.5	4.5	3	2.5	6.875	1.875	2	2.125
1	5	5.5	5.625	6.25	4	4.125	3.5	7.375	7.5	7.5	4.125	2.5	6.25	4.125
1	5	5.25	4.75	3.75	3.625	3.375	1.875	6.25	6	5.125	2.75	2.875	3.25	2.125
1	4	3.25	3.375	3.375	3.125	3.875	4.625	3.375	4.625	4.625	3.875	3.125	3.125	4.625
1	2.75	4.5	1.5	6	3.25	4.25	2	4.25	4.125	2.25	5.125	3.5	3.875	3.375
1	5.375	5.5	4.25	4.875	4.625	4.5	3.75	5.875	5.75	3.375	4.5	4.25	3.375	4.375
1	2.75	2.5	1	3.625	1	1.375	1.5	2.625	2.375	1.375	3.125	1.25	1.125	1.25
1	2.125	2.25	1.875	5.625	3.625	3.875	2.75	2.75	2.5	2.125	5.375	3.75	3.125	4.125
1	4.5	5.125	1.875	2.5	1	3.25	2.75	4	3.375	3	2	1.5	3.625	3.875
1	2.625	2.375	4	4.875	2.375	2.5	2.75	2.375	4.125	4	3	2.25	1	3.75
1	6	6.75	5.875	4	2.125	5.875	5	7	5.625	5.125	3.625	3.125	5.75	5.125
1	4.875	5.25	4.875	4.25	3	4.25	4	5.625	5.5	4	4	3	4.375	4.125
1	4	2.75	1.125	4.875	1.5	1.625	1.75	5.25	2	1.25	4	1.75	2.625	2
1	3.875	4.5	2.625	4.25	3.375	2.875	1.875	5.625	5.375	2.75	4.625	4	4.875	3.75
1	1.83333	2.33333	2.33333	1	2.33333	3	4.83333	3.28571	3.16667	2.16667	1.71429	2.33333	2.14286	2.66667
1	3.625	3.75	2.375	6.375	2.375	2.625	1	5	4.625	4	5.25	3.875	2.375	2.5
1	7.125	6.375	2.875	7.375	2.5	4.125	1.75	6.375	5.75	4.25	6.5	3.125	5.25	3
1	4	3	2.125	5.875	4.5	3.875	2.75	5.25	5	3.375	5.375	4.125	5.125	2.75
1	5.25	6.375	2.75	4.875	2	4.375	1.625	4.625	5.625	3.625	3.625	2.75	4.25	2.75
2	2.75	1.875	1.125	5	1.25	1.125	2.125	1.125	1	1.75	7.375	1.125	1.375	2
2	1.875	2.125	2.125	6.625	2.125	1.375	2.5	2.875	2.5	2.375	5.375	2.125	1.75	3.5
2	4.25	3.875	1.5	3.875	1.625	2.625	1.75	4	3.75	3.625	4.375	1.5	4.25	2.5
2	1.625	1	1.75	5.25	1.75	2	2.375	1.875	1.25	2.25	5	1.375	1.625	3
2	4.125	2.625	2.625	6.875	2.75	2.375	2.75	2.5	2.375	1.25	7.5	3	3	2.125
2	5.625	6.25	1.25	6.125	2	1.5	2.75	3.25	3.125	3.875	7.875	2.75	2.25	2.5
2	4.625	5.125	3	1.375	2.625	5.25	3.625	3.75	5	5	1.625	2.25	7.375	5
2	4.875	5	3.625	5.75	1.25	3.5	2	4.125	3.875	5.625	6.25	2	4	1.75
2	2.25	1.625	1.125	5	1.375	2.25	2	1.125	1	1.75	6.625	1.5	2.25	1.5
2	4.25	4.5	2.125	5.125	1.625	4.5	1.875	2.125	3	2.125	5.75	2	2.625	1.125
2	1.875	1.625	2	4.25	1.75	1	2.75	1.625	1.5	2.125	5.875	1.75	1.125	2.75
2	3.25	3.25	2.75	6.875	1.5	3.625	1.625	2.375	2.625	3.125	7.625	1.375	3.375	1.875
2	4.125	4.875	5	4.25	1	1.75	2.5	2.25	2.625	7	6	2.125	2.75	2.625
2	2.625	2.875	1.625	6	1.25	1.375	2	2.25	2.25	3.375	6.125	1.25	3.75	3.125
2	2.5	2.125	2	4.5	2.25	2.125	2.75	2.25	2	2.375	4.25	1.875	2.875	3.125
2	3.75	4.5	3	6	2.5	2.125	1.5	2.5	3	3.375	6.625	1.375	3.5	2
2	4.125	3.5	2.625	5.875	3.375	5.625	2.75	3.5	4.375	4.875	3.25	2.25	6.5	3.625
2	3.75	4.5	3	6	2.5	2.125	1.5	2.5	3	3.375	6.625	1.375	3.5	2
2	2.875	2.375	1.5	2.75	1.75	2	2.25	4.125	2.75	2.375	2	1.25	3.125	2.875
2	4.375	5.875	1.875	5.25	2	2.125	2.5	4.75	4.375	5.125	4.125	2.625	4.5	3.625
2	3.375	3.5	2.625	7.875	1.875	1	1.875	2	1.25	2	8.125	1.625	1.5	2.375
2	2.5	3.375	2.625	4	2.375	2	1.875	3.875	2.75	3	5.125	2.375	2.5	3.625
2	4	4.375	2.5	4.5	2.125	4.125	2.375	3.375	3.625	3.375	4.5	1.375	5.375	3.875
2	2.375	2.375	1	3.125	2.125	1.25	2	1.75	1.375	1.5	3.75	1.875	2.625	1.5
2	3.375	2.25	2.5	4.5	2	2.75	2.625	3.25	3	2.25	5.125	2.125	2.75	2.125
2	1.75	1.875	2.125	5	1.25	2.625	2.125	1.875	1.875	3.875	4.25	1.5	2.875	2.125
2	4.25	3.125	2.625	4.75	2.125	3.125	2	4.5	4	3.125	5.375	1.875	3.25	1.875
2	1.75	1.5	1.625	6.625	2.25	1.5	2	1.375	1.75	1.75	5.625	2.75	2.125	3
2	4.125	4.375	3.875	4.125	2.125	2.125	2.625	4.625	4.625	4.125	3.125	2	2.625	3.375
2	4.5	3.5	3.375	3.625	1.875	6.125	2	4.125	4.25	4.25	3.375	2.5	6.375	2.25
